# Supplementary material
Source: PubMed Central journal article supplement (PMC2759835)
Supplement: supp_M900100-JLR200_suppdata.pdf [file supp_M900100-JLR200_suppdata.pdf]

## SUPPORTING ONLINE MATERIAL

### SUPPLEMENTARY FIGURE LEGENDS

#### **Supplementary Figure 1. Reproducibility of Positive Ion Mode (MALDI-TOF & MALDI-FITCR)**

**Phospholipid Imaging Data.** Each column represents a different day 8 implantation site each from a different mouse. Each row represents a unique potassiumated phospholipid ( $[M+K]^+$ ) and how it localizes in each of the 8 different implantation sites. SM, sphingomyelin; PC, phosphatidylcholine; MALDI, Matrix-Assisted Laser Desorption/Ionization; TOF, Time-of-flight; FTICR, Fourier Transform Ion Cyclotron Resonance.

#### **Supplementary Figure 2. Reproducibility of Negative Ion Mode (MALDI-TOF & MALDI-FITCR)**

**Phospholipid Imaging Data.** Each row represents a different day 8 implantation site each from a different mouse. Each column represents a unique phospholipid ( $[M-H]^-$ ) and how it localizes in each of the 4 different implantation sites. PE, phosphatidylethanolamine; PEp, phosphatidylethanolamine plasmalogen; PI, phosphatidylinositol; LPI, lysophosphatidylinositol; PS, phosphatidylserine; PG, phosphatidylglycerol; MALDI, Matrix-Assisted Laser Desorption/Ionization; TOF, Time-of-flight; FTICR, Fourier Transform Ion Cyclotron Resonance.

#### **Supplementary Figure 3. Reproducibility of MALDI-FTICR IMS analysis of embryo implantation**

**in the mouse uterus on day 6 of pregnancy.** (a) This picture shows a mouse uterus on day 6 of pregnancy and an enlargement of the implantation site which was sectioned. (b) The optical images of the 9 serial center sections (*left*) with corresponding 150  $\mu$ m lateral resolution MALDI-FTICR images (*right*). Phospholipid identities ( $[M+K]^+$ ) are listed above their respective columns. Each column is set to the same relative intensity scale. SM, Sphingomyelin; PC, phosphatidylcholine; MALDI, Matrix-

Assisted Laser Desorption/Ionization; FTICR, Fourier Transform Ion Cyclotron Resonance; AM, antimesometrial pole; M, mesometrial pole.

**Supplementary Figure 4. A Look at Positive Ion Mode MALDI-TOF Image Spectra.** All spectra is from representative “top” and “bottom” areas of a day 8 implantation site which are depicted as a green and blue circles on the optical image, respectively. Potassiated  $[M+K]^+$  peaks were used to reconstitute images. SM, sphingomyelin; PC, phosphatidylcholine; M, mesometrial; AM, antimesometrial.

**Supplementary Figure 5. A Look at Negative Ion Mode MALDI-TOF Image Spectra.** All spectra is from representative “top” and “bottom” areas of a day 8 implantation site which are depicted as a green and blue circles on the optical image, respectively. PE, phosphatidylethanolamine; PEp, phosphatidylethanolamine plasmalogen; PI, phosphatidylinositol; LPI, lysophosphatidylinositol; PS, phosphatidylserine; PG, phosphatidylglycerol; M, mesometrial; AM, antimesometrial.

**Supplementary Figure 6. Identification of isobaric phospholipid species in day 8 implantation sites using high resolution MALDI-FTICR IMS.** MALDI-TOF images (*top*) representative of spectral peaks 100-200 mDa in width. MALDI-FTICR images (*bottom*) representative of spectral peaks 10-20 mDa in width. As an example of MALDI-FTICR spectra we have included a single FTICR spectrum (20 shots) underneath the corresponding FTICR images. The laser spot (purple spot) where this spectrum was obtained is denoted by a red circle on the matrix coated optical image. PC, phosphatidylcholine.

**Supplementary Figure 7. MALDI-MS/MS spectra.** (a) Fragmentation spectra of PI 36:2 in negative ion mode. (b) Fragmentation spectra of PC 36:2 in positive ion mode [matrix was doped with 100 mM lithium chloride]. GPIs (PI), phosphatidylinositol; GPC (PC), phosphatidylcholine.

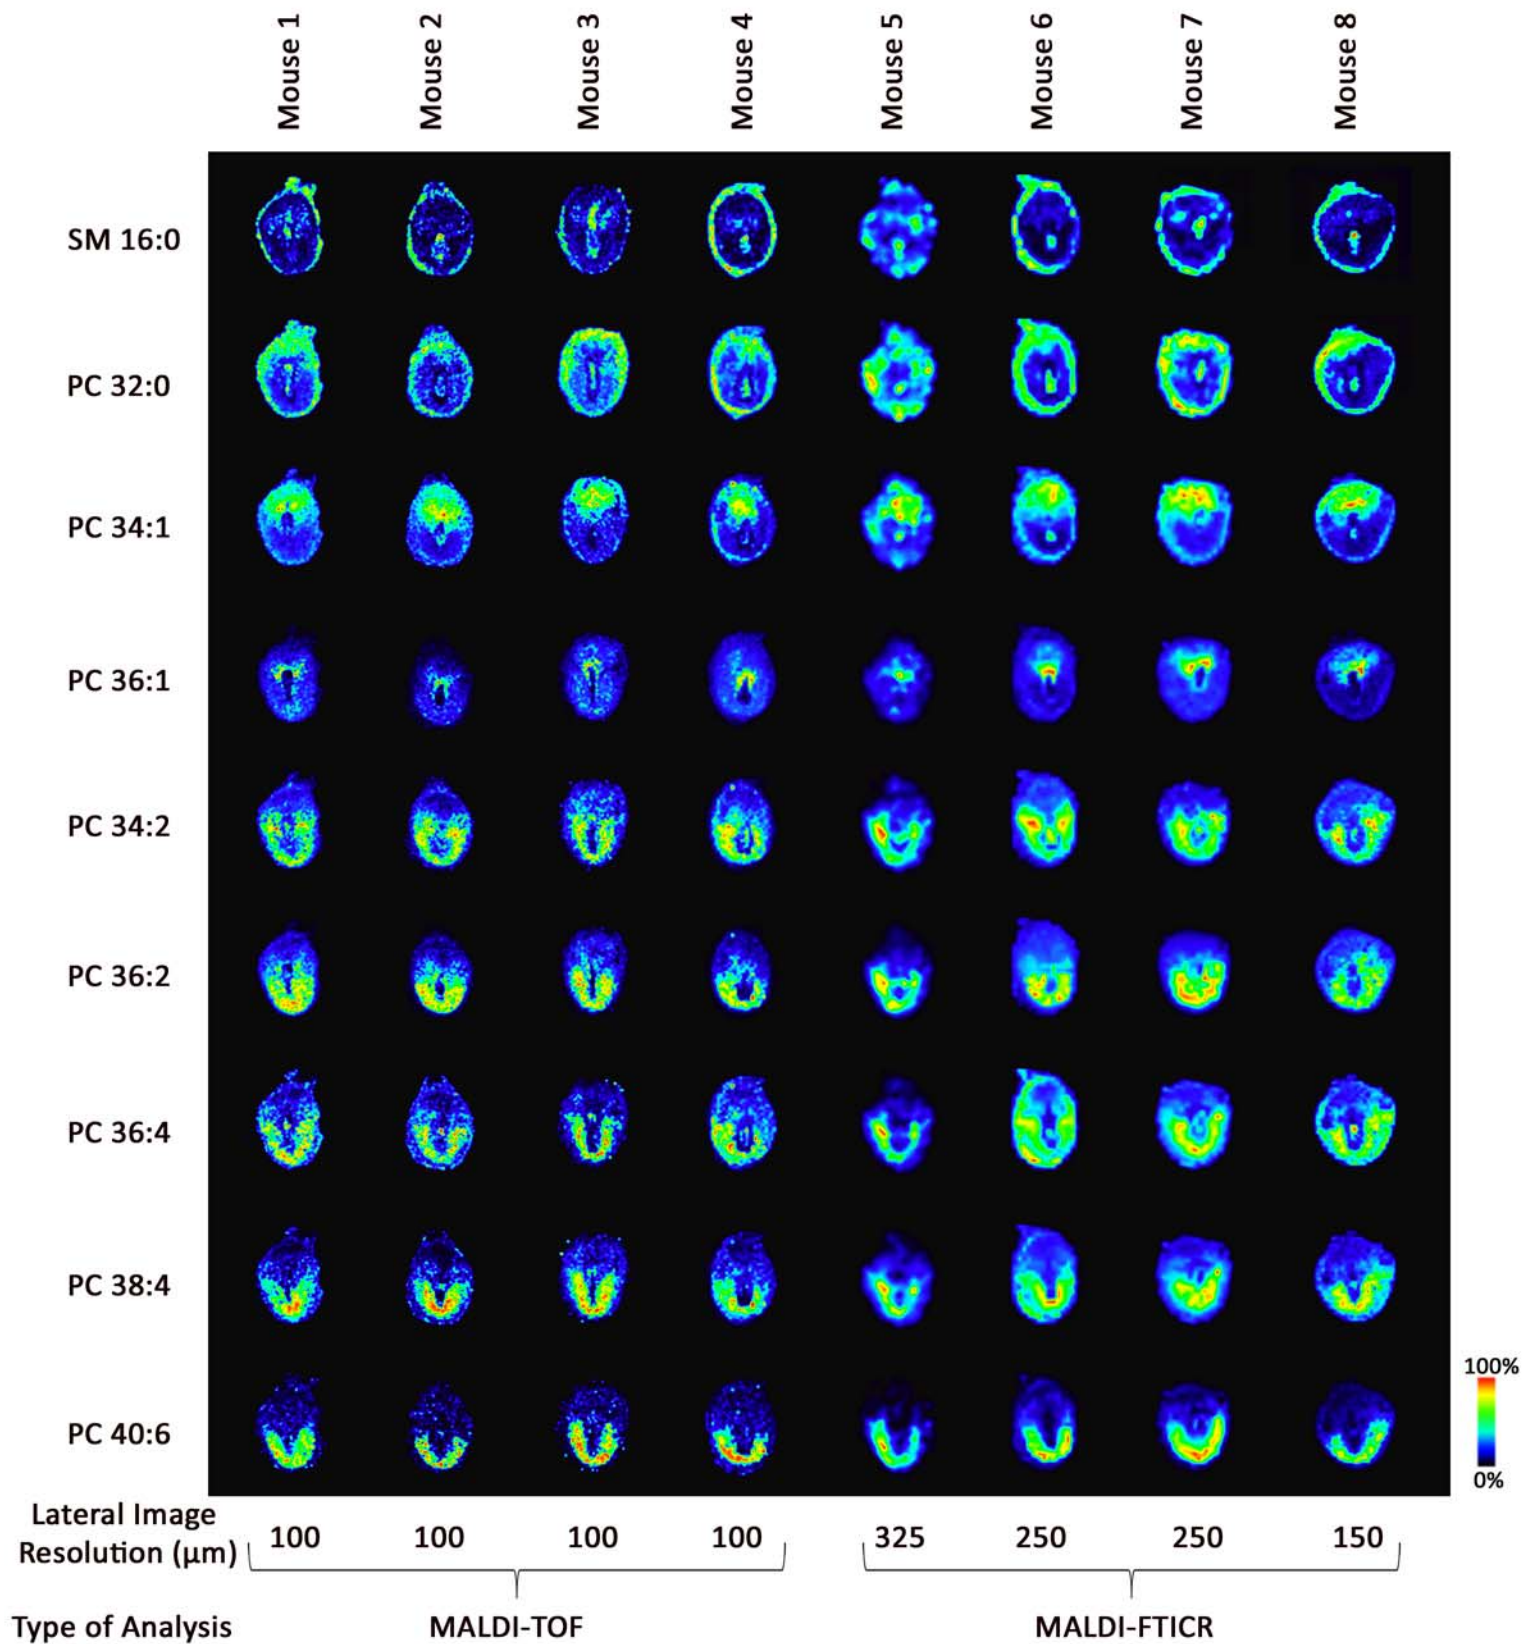

Supplementary Figure 1

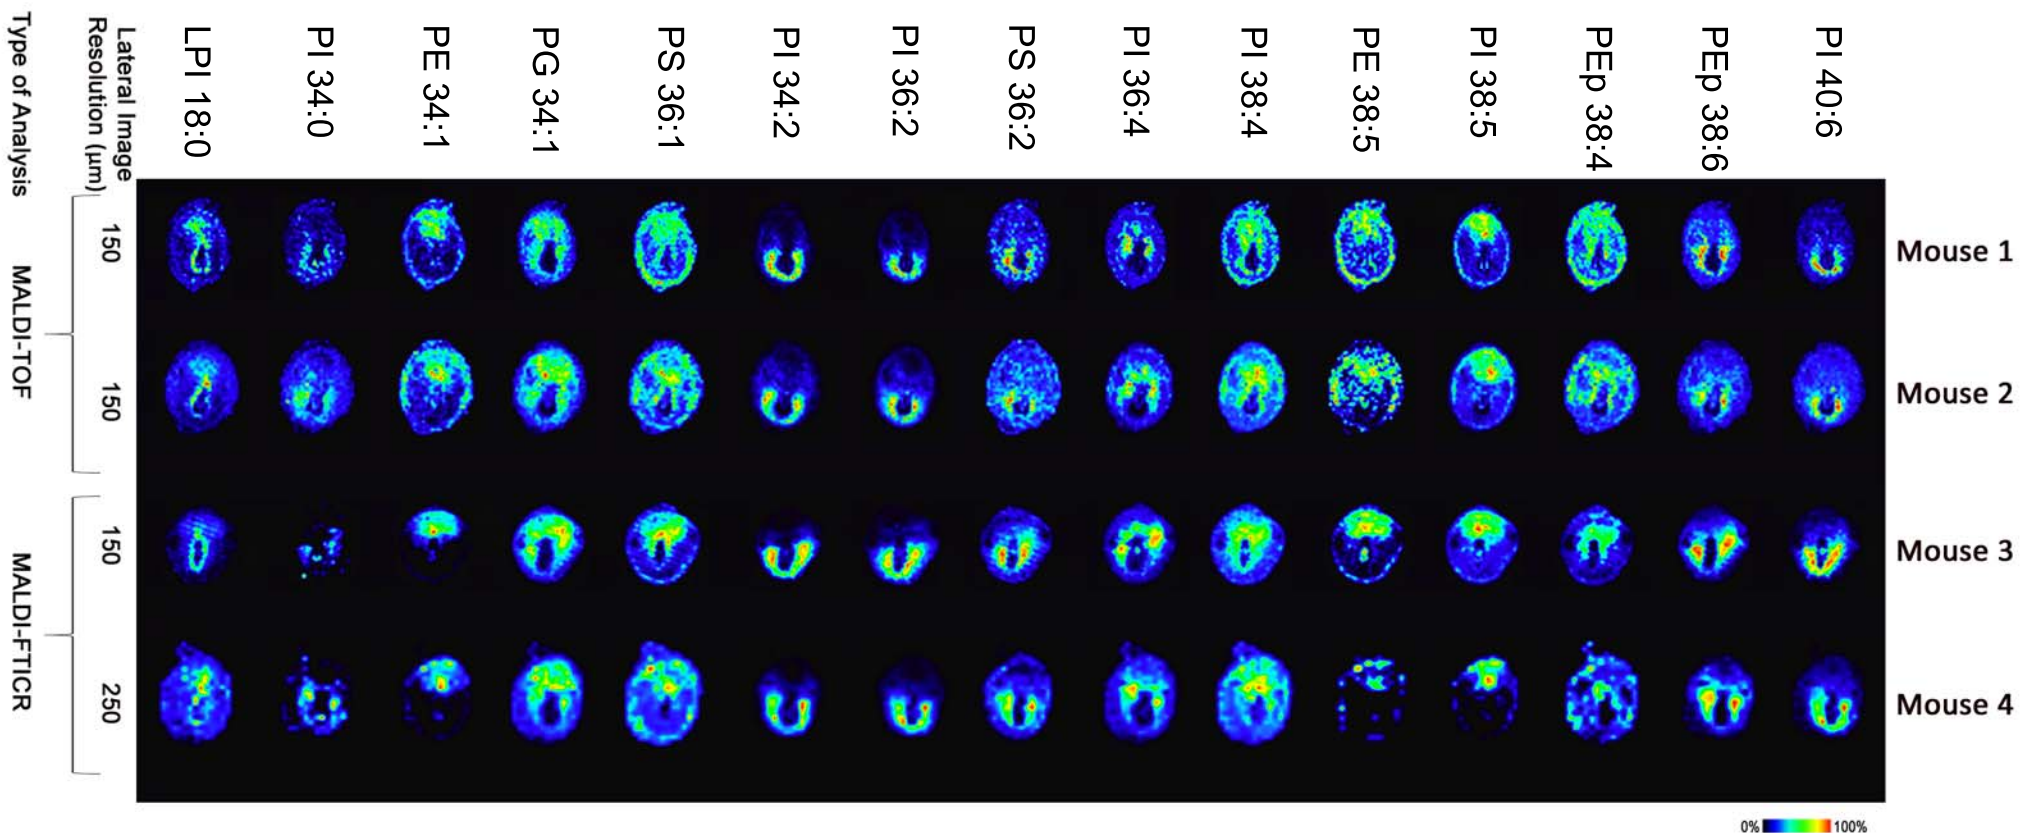

Supplementary Figure 2

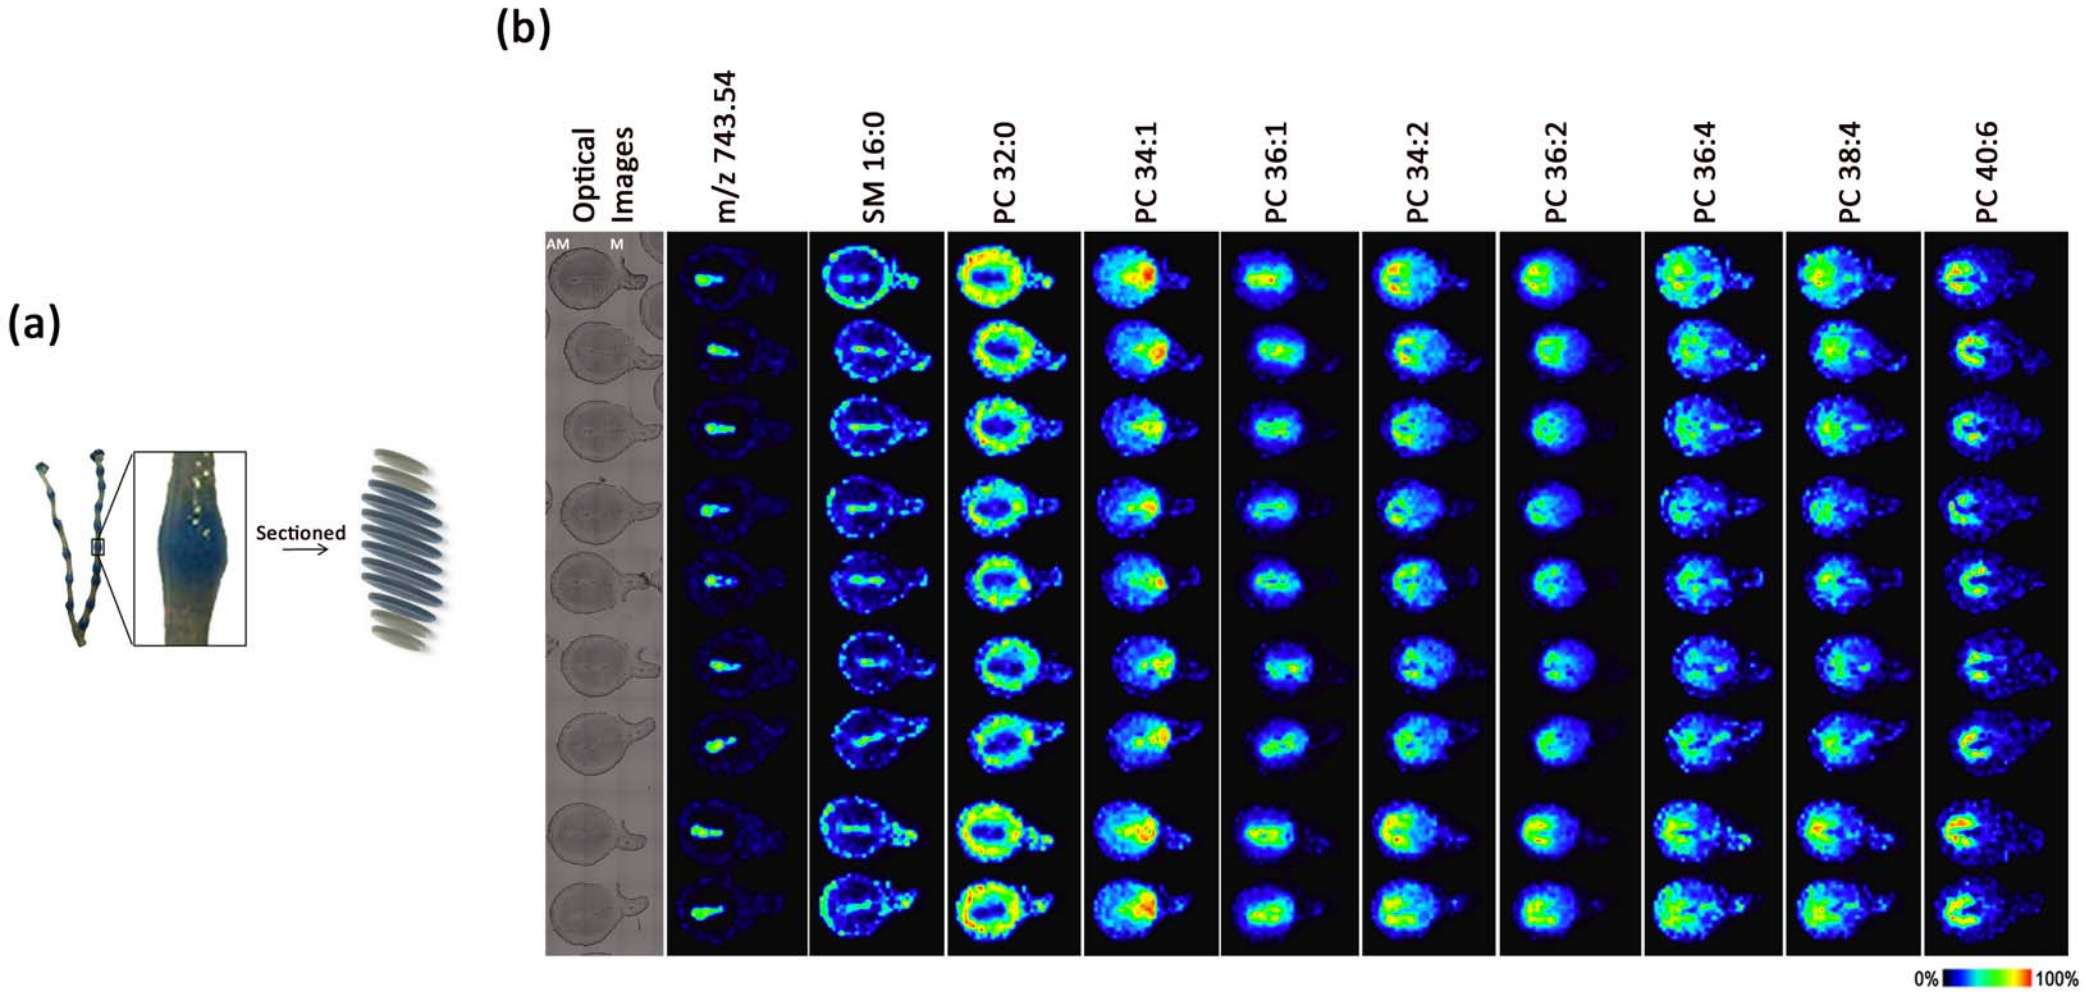

Supplementary Figure 3

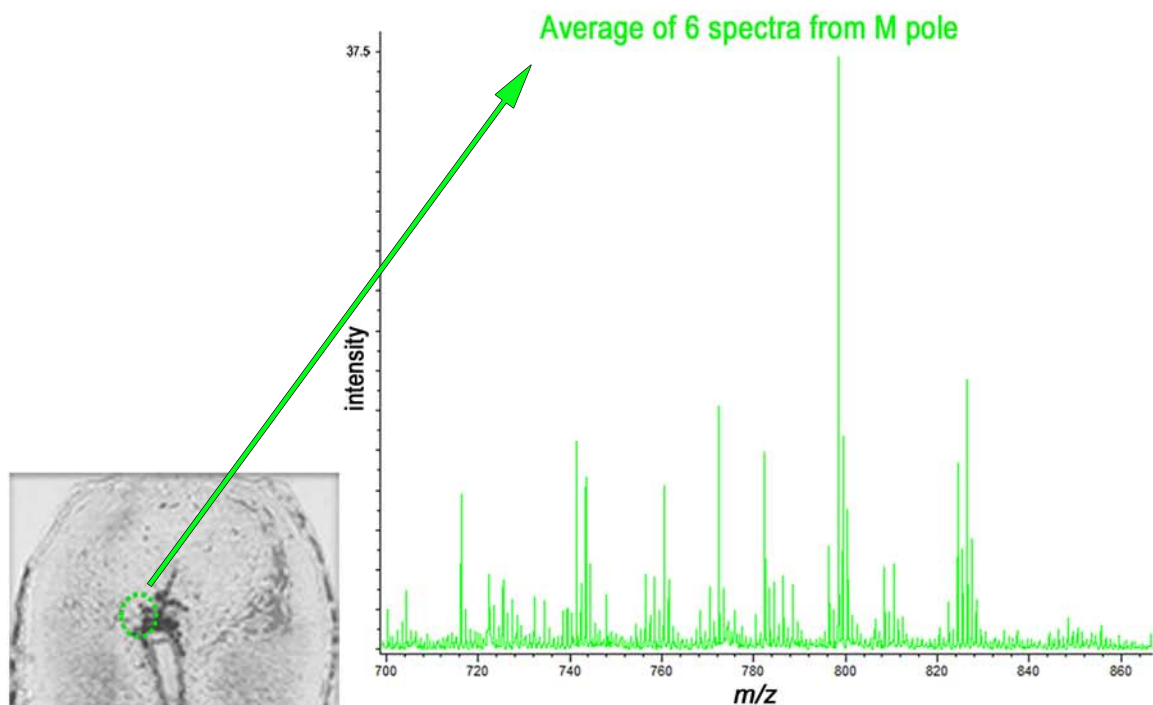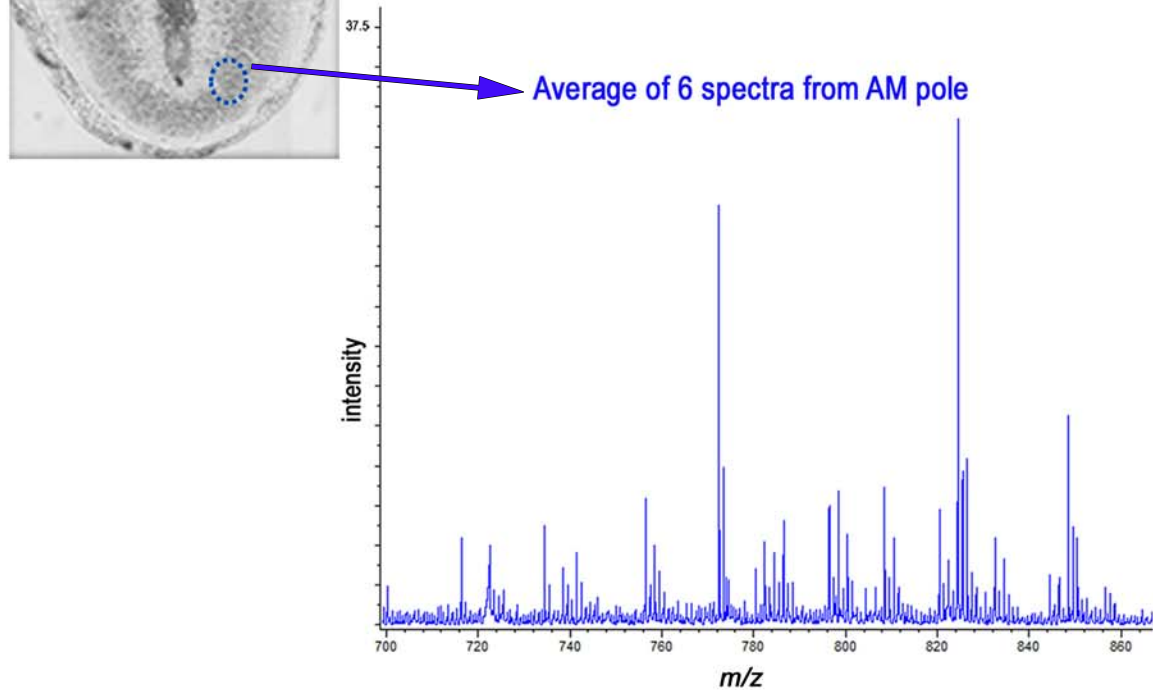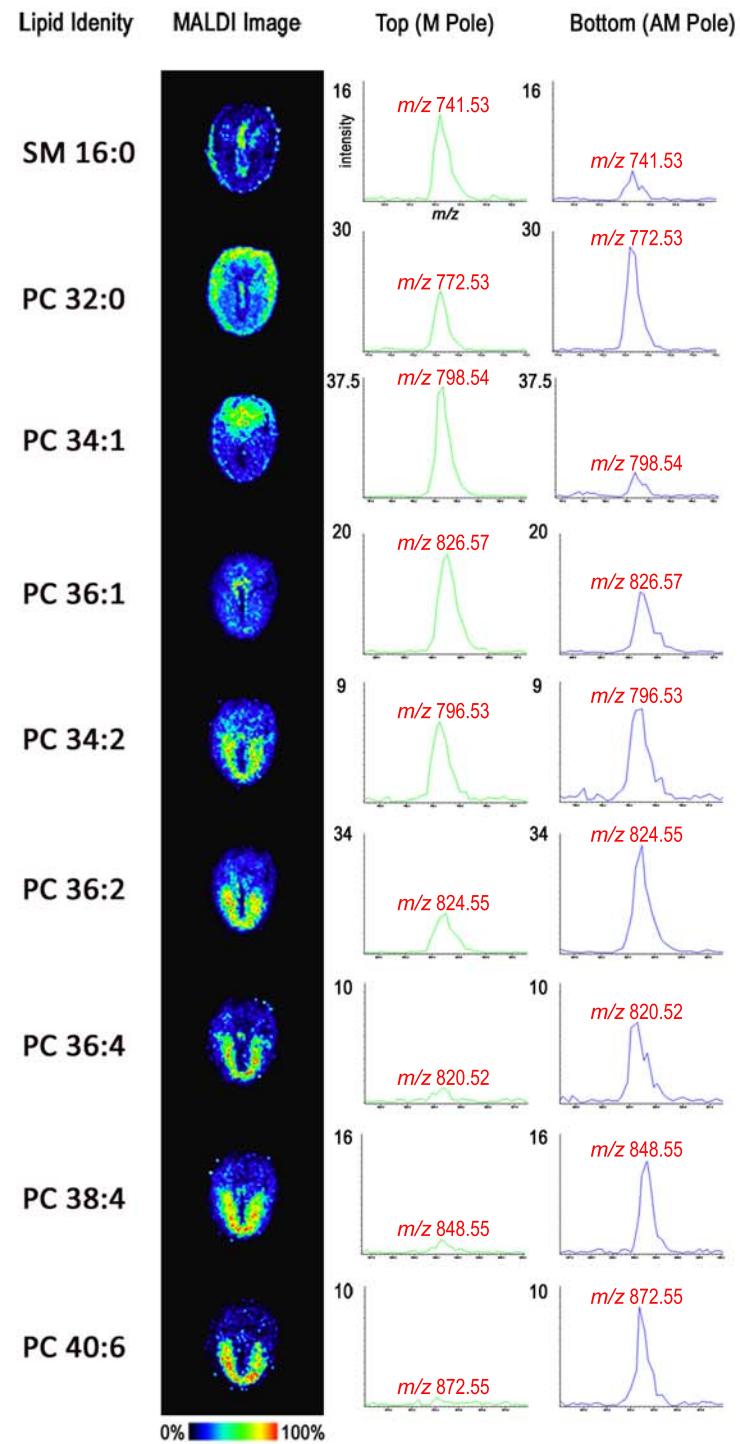

Supplementary Figure 4

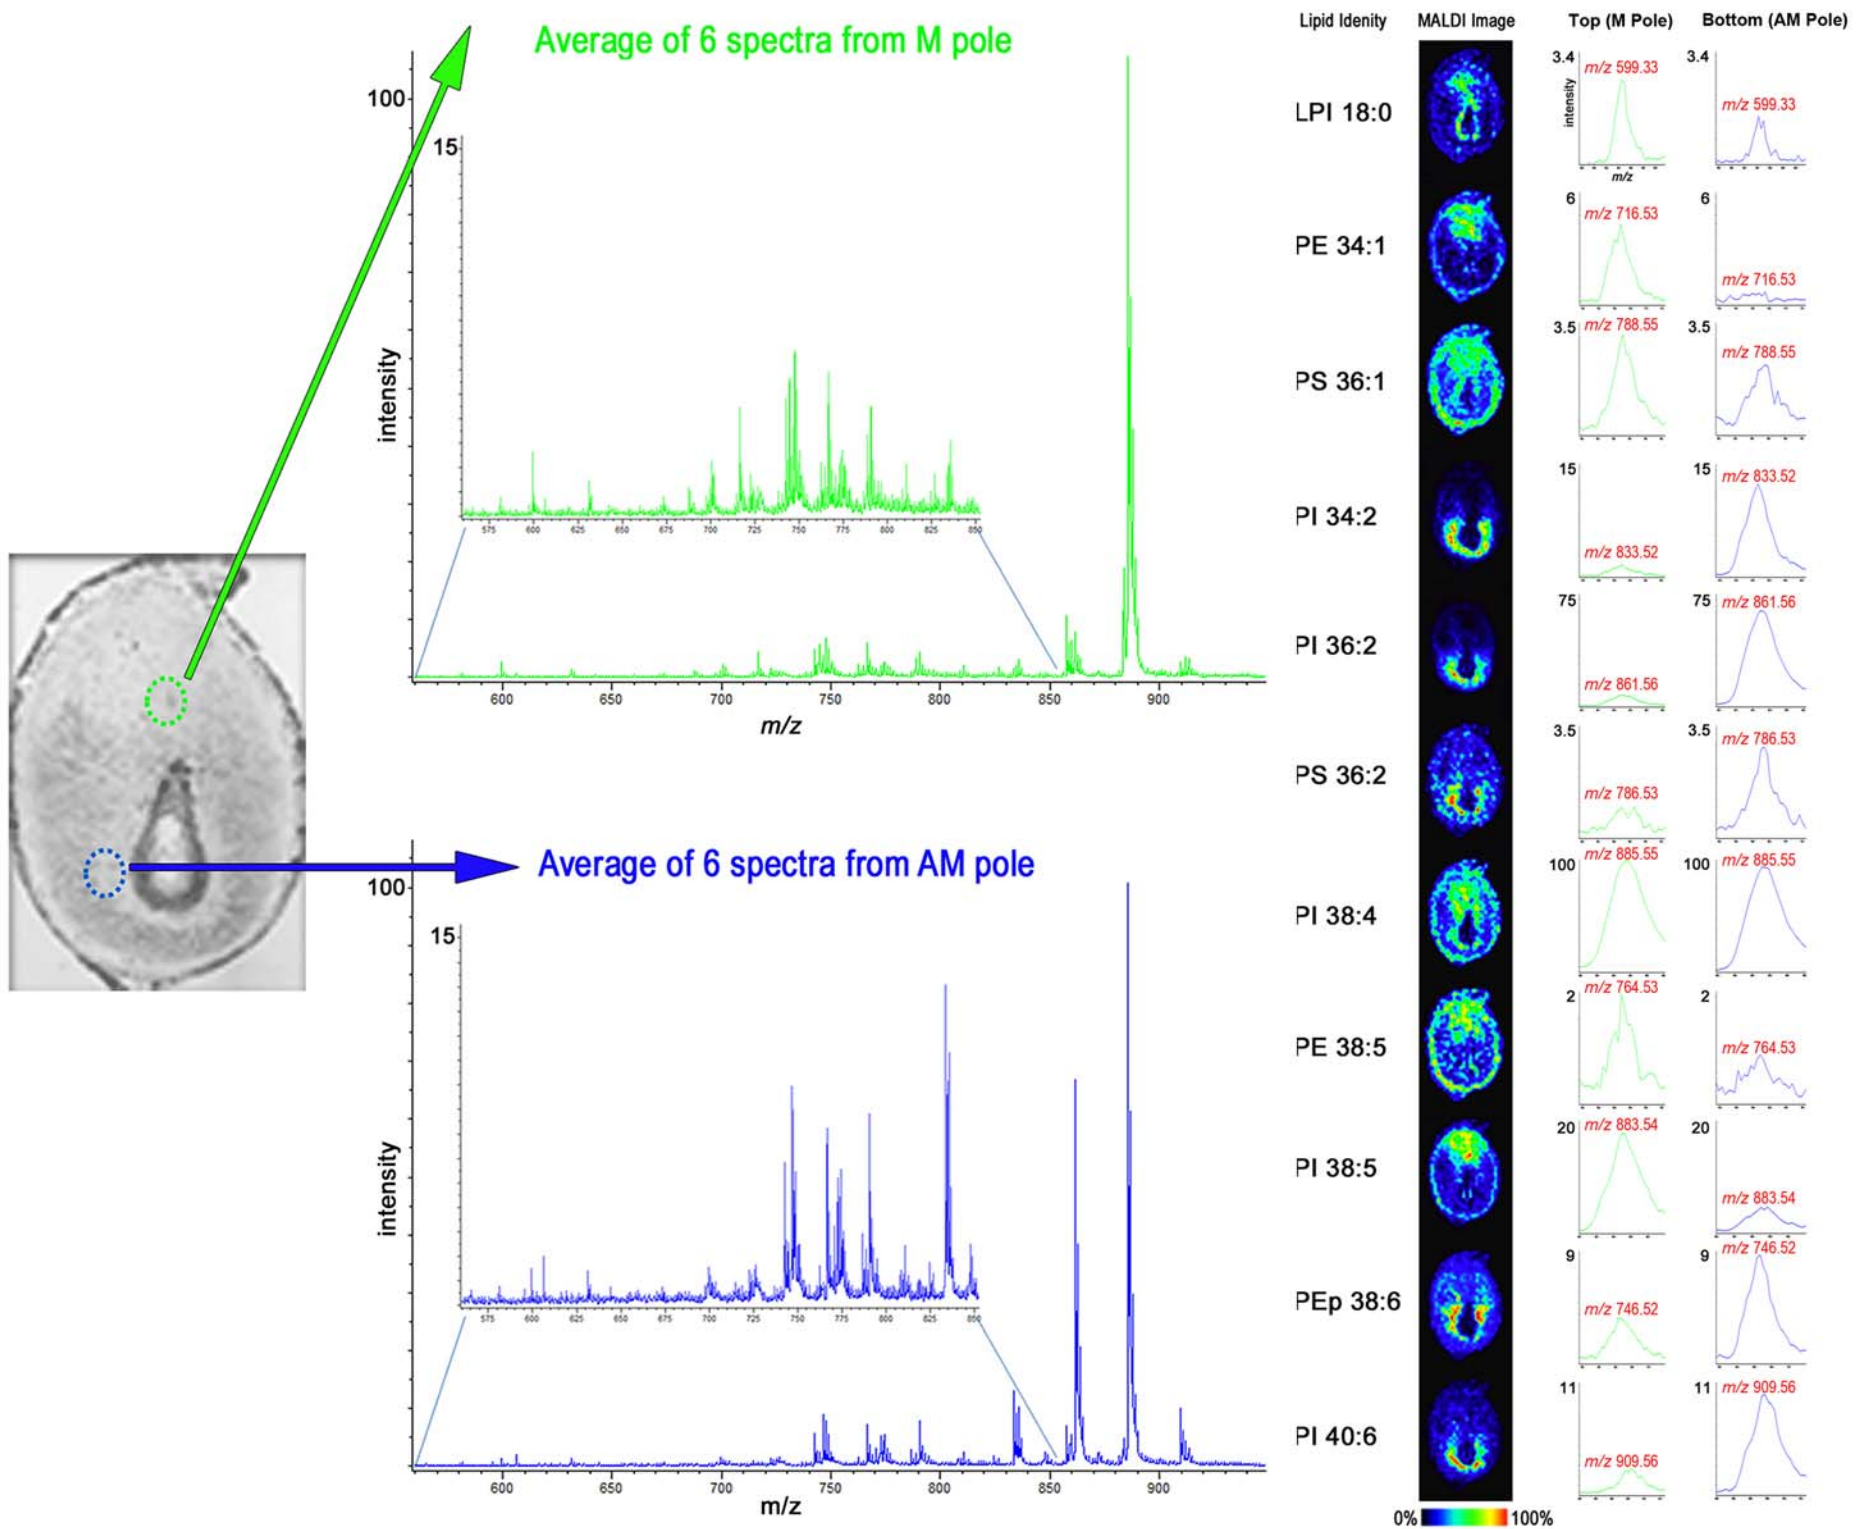

Supplementary Figure 5

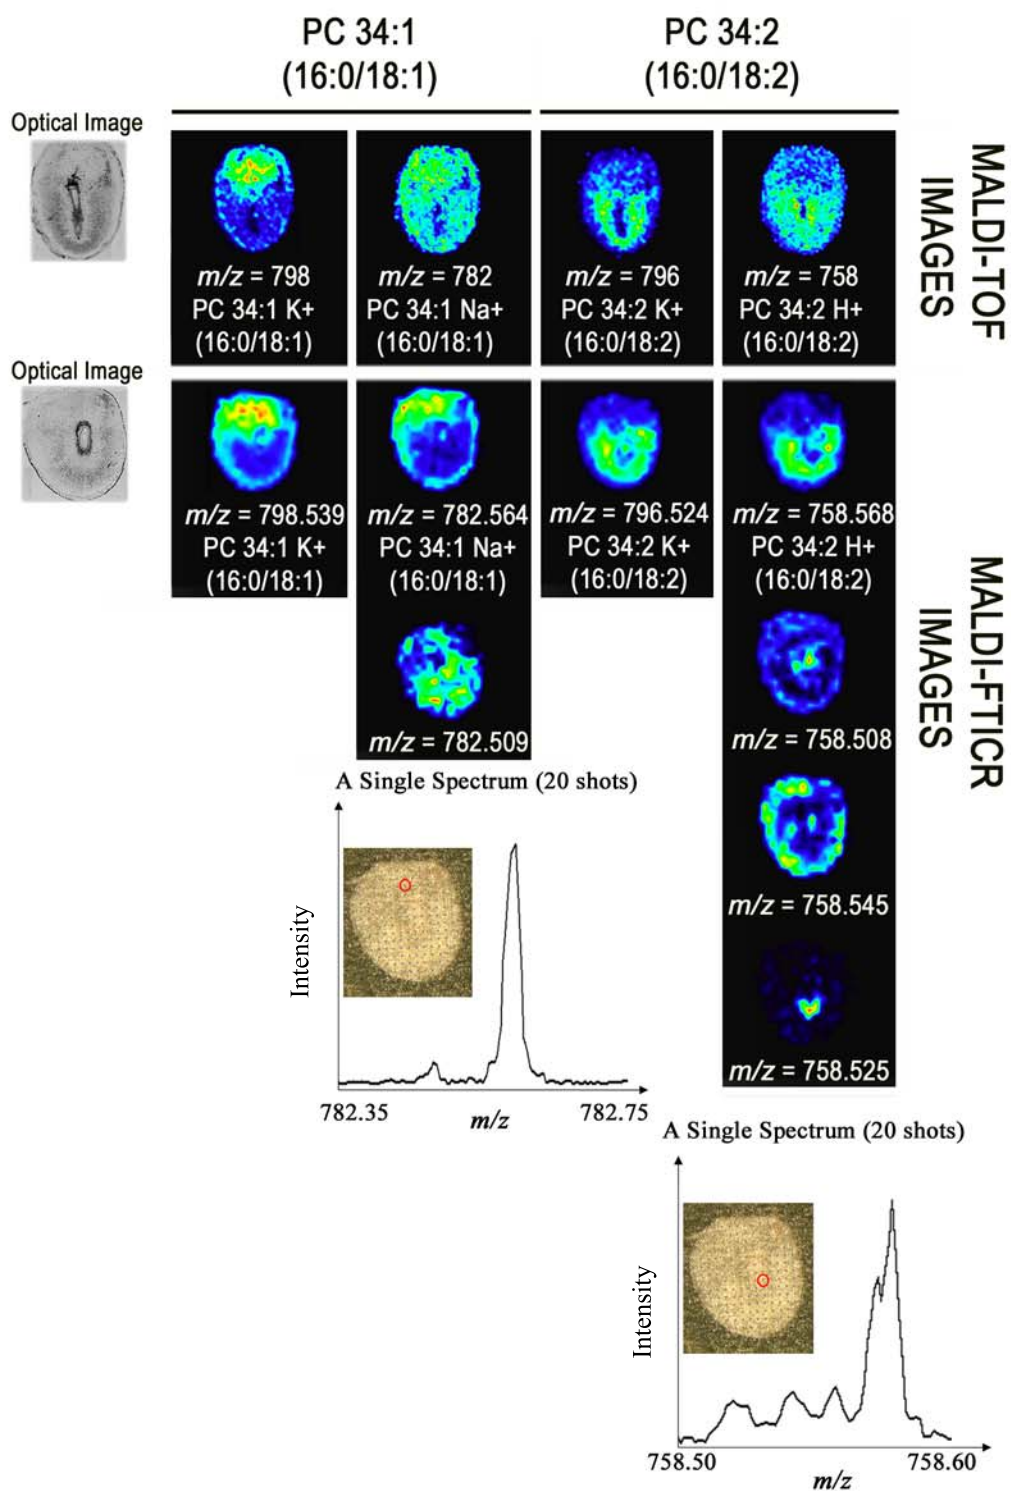

Supplementary Figure 6



(a)

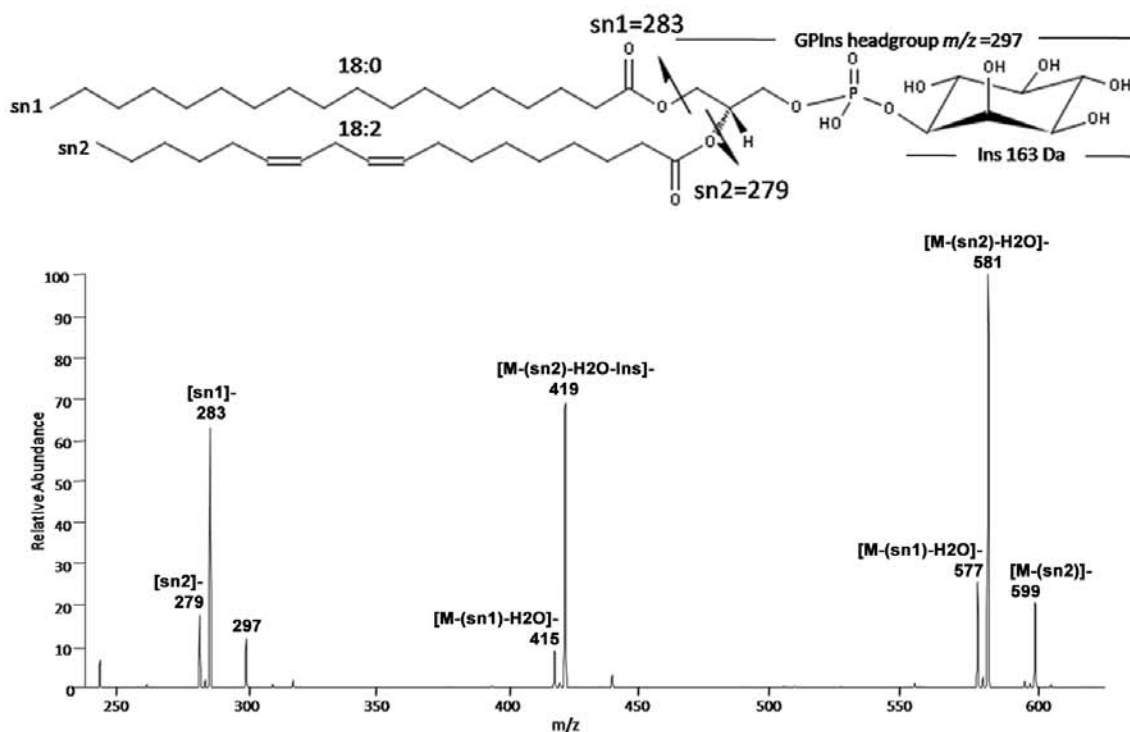

(b)

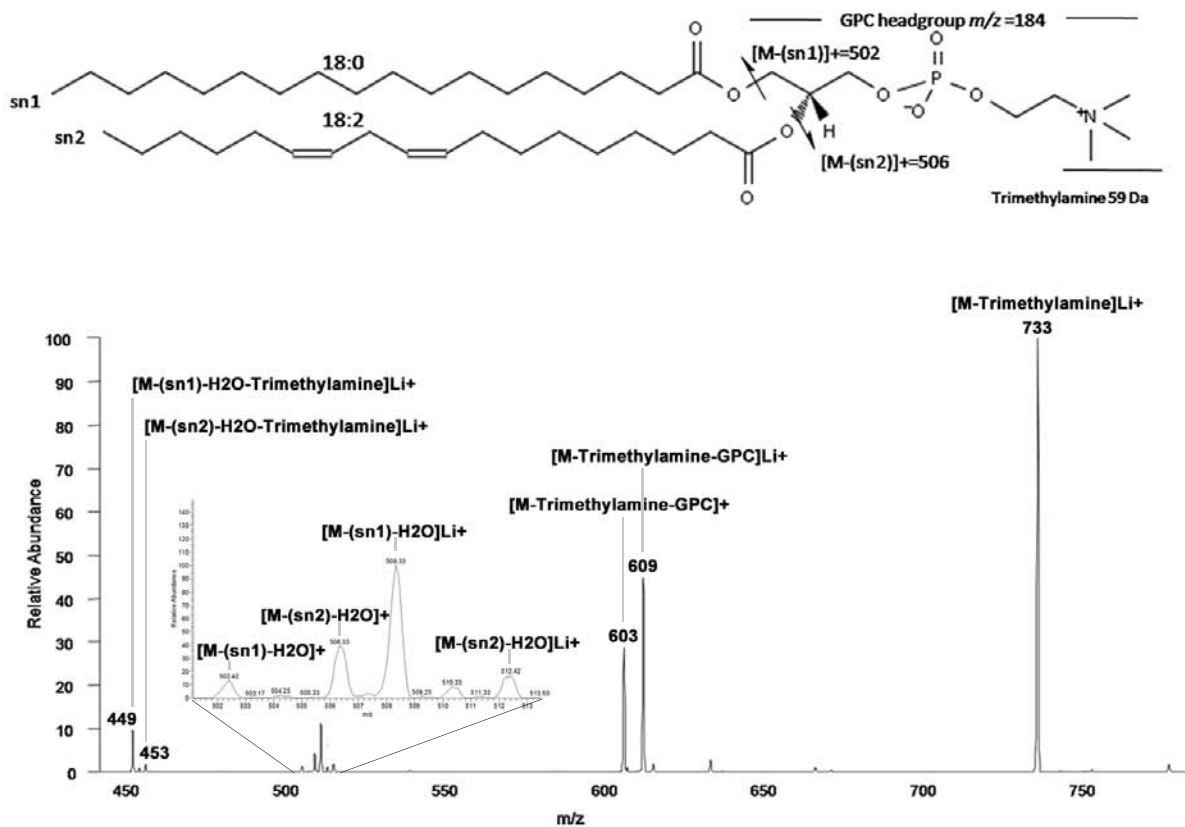

# Supplementary Figure 7

## Supplementary Table 1. Positive Ion Mode MALDI-MS/MS Data

Assignment of lipid molecular species in MS/MS positive ion mode

| Class | Molecular species (C1 acyl chain/ C2 acyl chain) | Ion Type            | <i>m/z</i> <sup>a</sup> | Lithium induced MS/MS Peaks <sup>^</sup>    |
|-------|--------------------------------------------------|---------------------|-------------------------|---------------------------------------------|
| SM    | 16:0                                             | [M+H] <sup>+</sup>  | 703.573                 | 650                                         |
|       |                                                  | [M+Na] <sup>+</sup> | 725.555                 |                                             |
|       |                                                  | [M+K] <sup>+</sup>  | 741.529                 |                                             |
| PC    | 32:0(16:0/16:0)                                  | [M+H] <sup>+</sup>  | 734.568                 | 681, 551, 557, 484, 425, 478                |
|       |                                                  | [M+Na] <sup>+</sup> | 756.551                 |                                             |
|       |                                                  | [M+K] <sup>+</sup>  | 772.526                 |                                             |
| PC    | 34:0(16:0/18:0)                                  | [M+H] <sup>+</sup>  | 762.600                 | 709, 579, 585, 484, 425, 512, 506, 453      |
|       |                                                  | [M+Na] <sup>+</sup> | 784.581                 |                                             |
|       |                                                  | [M+K] <sup>+</sup>  | 800.554                 |                                             |
| PC    | 34:1(16:0/18:1)                                  | [M+H] <sup>+</sup>  | 760.584                 | 707, 583, 577, 510, 451, 478, 484, 425      |
|       |                                                  | [M+Na] <sup>+</sup> | 782.564                 |                                             |
|       |                                                  | [M+K] <sup>+</sup>  | 798.539                 |                                             |
| PC    | 36:1(18:0/18:1)                                  | [M+H] <sup>+</sup>  | 788.614                 | 735, 611, 605, 510, 451, 506                |
|       |                                                  | [M+Na] <sup>+</sup> | 810.594                 |                                             |
|       |                                                  | [M+K] <sup>+</sup>  | 826.569                 |                                             |
| PC    | 34:2(16:0/18:2)                                  | [M+H] <sup>+</sup>  | 758.568                 | 705, 581, 575, 508, 449, 478, 484, 425, 502 |
|       |                                                  | [M+Na] <sup>+</sup> | 780.548                 |                                             |
|       |                                                  | [M+K] <sup>+</sup>  | 796.524                 |                                             |
| PC    | 36:2(18:0/18:2)                                  | [M+H] <sup>+</sup>  | 786.600                 | 733, 609, 603, 508, 449, 506, 512, 453, 502 |
|       |                                                  | [M+Na] <sup>+</sup> | 808.581                 |                                             |
|       |                                                  | [M+K] <sup>+</sup>  | 824.554                 |                                             |
| PC    | 36:4(16:0/20:4)                                  | [M+H] <sup>+</sup>  | hidden by 34:1 Na+      | 729, 605, 599, 532, 473, 478, 425, 484      |
|       |                                                  | [M+Na] <sup>+</sup> | 804.550                 |                                             |
|       |                                                  | [M+K] <sup>+</sup>  | 820.524                 |                                             |
| PC    | 38:4(18:0/20:4)                                  | [M+H] <sup>+</sup>  | no peak                 | 633, 757, 627, 532, 473, 506, 526, 512, 453 |
|       |                                                  | [M+Na] <sup>+</sup> | 832.580                 |                                             |
|       |                                                  | [M+K] <sup>+</sup>  | 848.554                 |                                             |
| PC    | 40:6(18:0/22:6)                                  | [M+H] <sup>+</sup>  | 834.596                 | 781, 657, 651, 556, 497, 506, 453, 512      |
|       |                                                  | [M+Na] <sup>+</sup> | 856.581                 |                                             |
|       |                                                  | [M+K] <sup>+</sup>  | 872.554                 |                                             |

<sup>a</sup> Data acquired on a MALDI-FTICR Mass Spectrometer

<sup>^</sup> arrangement - highest intensity ion (left) to lowest intensity ion (right) in the MALDI-MS/MS spectra (decimal values not included)

**Note: All positive ion mode images depict the potassiated [M+K]<sup>+</sup> form of each phospholipid species since they had the highest intensity in this study**

## Supplementary Table 2. Negative Ion Mode MALDI-MS/MS Data

Assignment of lipid molecular species in MS/MS negative ion mode

| Class | <i>m/z</i> <sup>a</sup> | MS/MS Peaks <sup>^</sup>                    | Molecular species (C1 acyl chain/ C2 acyl chain)                  |
|-------|-------------------------|---------------------------------------------|-------------------------------------------------------------------|
| LPI   | 599.332                 | 283, 419, 315                               | <b>18:0</b>                                                       |
| PE    | 716.528                 | 281, 255, 452, 478                          | 34:1(16:0/ <b>18:1</b> )                                          |
| PG    | 747.521                 | 281, 255, 391, 465, 483, 491, 509           | 34:1(16:0/ <b>18:1</b> )                                          |
| PS    | 788.551                 | 701, 419, 283, 417, 504                     | 36:1(18:0/ <b>18:1</b> )                                          |
| PI    | 857.522                 | 553, 391, 571, 303, 255, 439, 601, 297      | 36:4(16:0/ <b>20:4</b> )                                          |
| PI    | 885.553                 | 581, 419, 283, 599, 601, 303, 439, 297, 619 | 38:4(18:0/ <b>20:4</b> )                                          |
| PE    | 764.529                 | 303, 281, 478                               | 38:5(18:1/ <b>20:4</b> )                                          |
| PI    | 883.541                 | 579, 417, 281, 597, 601, 303, 297, 439, 619 | 38:5(18:1/ <b>20:4</b> )                                          |
| PEp   | 750.549                 | 331, 436                                    | 38:4(16:0p/ <b>22:4</b> )                                         |
| PI    | 837.556                 | 581, 419, 283, 553, 599, 391, 297           | 34:0(18:0/ <b>16:0</b> )                                          |
| PI    | 833.523                 | 553, 391, 577, 255, 571, 279, 297           | 34:2(16:0/ <b>18:2</b> )                                          |
| PI    | 861.558                 | 581, 419, 283, 577, 599, 415, 279, 297      | 36:2(18:0/ <b>18:2</b> )                                          |
| PS    | 786.534                 | 699, 419, 283, 415, 279                     | 36:2(18:0/ <b>18:2</b> )                                          |
| PEp   | 746.517                 | 327, 436, 418                               | 38:6(16:0p/ <b>22:6</b> )                                         |
| PI    | 909.556                 | 581, 419, 283, 599, 625, 297, 327           | 40:6(18:0/ <b>22:6</b> )                                          |
| PE    | 742.543                 | 279, 283, 281, 480, 478                     | 36:2(18:0/ <b>18:2</b> , 18:1/ <b>18:1</b> )*                     |
| PE    | 770.575                 | 279, 283, 281, 460, 508, 307                | 38:2(20:0/ <b>18:2</b> , 18:0/ <b>20:2</b> , 18:1/ <b>20:1</b> )* |

<sup>a</sup> Data acquired on a MALDI-FTICR Mass Spectrometer

<sup>^</sup> arrangement - highest intensity ion (left) to lowest intensity ion (right) in the MALDI-MS/MS spectra (decimal values not included)

\* acyl chain identities confirmed by MS/MS imaging

**Supplementary Table 3. LC-MS/MS Data  
Predominantly bottom expression (AM pole)**

| weights (mg tissue):                | 15    | 15    | 15    | 14.5  | 15    | 15    |
|-------------------------------------|-------|-------|-------|-------|-------|-------|
| values below are ng lipid/mg tissue | top1  | top2  | topM  | bot1  | bot2  | BotM  |
| GPA(36:2)                           | 6     | 5.6   | 5.2   | 8.2   | 10.8  | 6.1   |
| GPA(38:4)                           | 4.6   | 4.3   | 4.2   | 6.1   | 6.7   | 5.7   |
| GPA(40:6)                           | 12.9  | 13.4  | 11.2  | 19.7  | 18.9  | 13.9  |
| GPCho(32:1e)/GPCho(32:0p)           | 1.1   | 0.6   | 1.1   | 1.9   | 1.7   | 1.3   |
| GPCho(34:2)*                        | 44.4  | 41.1  | 43.6  | 55.2  | 55.4  | 50.9  |
| GPCho(36:4)*                        | 71.9  | 69.0  | 73.7  | 97.1  | 67.2  | 83.6  |
| GPCho(36:4p)                        | 3.5   | 2     | 4.2   | 5.1   | 5.1   | 5.4   |
| GPCho(38:4)                         | 166.1 | 157.7 | 152.3 | 160.1 | 177.5 | 168.7 |
| GPCho(38:6e)/GPCho(38:5p)           | 5     | 4.4   | 5.1   | 6.8   | 13.1  | 7     |
| GPCho(40:6)*                        | 77.2  | 67.8  | 79.9  | 80.1  | 133.9 | 83.9  |
| GPEtn(34:2)                         | 6.4   | 6.5   | 5.5   | 7.2   | 6.4   | 8     |
| GPEtn(36:0)                         | 41.3  | 30.2  | 40.9  | 52.2  | 62.7  | 43.3  |
| GPEtn(36:4e)/GPEtn(36:3p)           | 4.4   | 2.8   | 4     | 5.3   | 4.7   | 4.6   |
| GPEtn(38:4)                         | 81.2  | 76.5  | 71.3  | 97    | 80.8  | 94.4  |
| GPGro(36:3)                         | 16.7  | 14.1  | 15.3  | 21.1  | 30.5  | 17.5  |
| GPGro(36:4)                         | 10.6  | 8.6   | 8.8   | 18.1  | 26.7  | 14.5  |
| GPGro(38:1)                         | 1.4   | 1     | 1.3   | 1.8   | 2.5   | 1.5   |
| GPGro(42:10)                        | 4.9   | 4     | 5     | 8.1   | 14.4  | 7     |
| GPGro(44:10)                        | 4.2   | 3.3   | 3.8   | 4.8   | 6.4   | 4.3   |
| GPGro(44:11)                        | 6.5   | 5.2   | 6.5   | 10.1  | 10.5  | 8.2   |
| GPGro(44:12)                        | 21.3  | 16.4  | 21.1  | 31    | 39.5  | 27.2  |
| GPIIns(32:0)                        | 0.3   | 0.5   | 0.4   | 1     | 1.2   | 1.1   |
| GPIIns(34:1)                        | 3.9   | 3.6   | 3.4   | 6.2   | 9     | 6.5   |
| GPIIns(34:2)*                       | 4.3   | 3.9   | 4.5   | 11.4  | 17.6  | 9.9   |
| GPIIns(36:1)                        | 1.6   | 1.7   | 1.9   | 4.1   | 5.4   | 3.8   |
| GPIIns(36:2)                        | 6.2   | 6     | 6.6   | 16    | 22.1  | 13.2  |
| GPIIns(38:6)                        | 1.7   | 1.5   | 1.3   | 2.9   | 3     | 2.4   |
| GPIIns(40:4)                        | 1.8   | 1.7   | 1.9   | 2.6   | 2     | 2.3   |
| GPIIns(40:6)*                       | 2.4   | 2.3   | 2.5   | 4.7   | 5.4   | 4     |
| GPSer(38:4)                         | 49.8  | 48.4  | 44.2  | 66.4  | 61.1  | 50.6  |
| GPSer(42:8)                         | 0.8   | 0.4   | 0     | 0.9   | 1.2   | 0.8   |
| GPThr(38:4)                         | 2.4   | 2.7   | 2.5   | 3.8   | 3.2   | 3     |

\*LC-MS/MS data correlates with MALDI images

GPCho (PC) = phosphatidylcholine, GPEtn (PE) = phosphatidylethanolamine, GPGro (PG) = phosphatidylglycerol, GPIIns (PI) = phosphatidylinositol, GPSer (PS) = phosphatidylserine

**Supplementary Table 3. LC-MS/MS Data  
Predominantly top expression (M pole)**

|                                     | weights (mg tissue): |      |      |      |      |      |
|-------------------------------------|----------------------|------|------|------|------|------|
|                                     | 15                   | 15   | 15   | 14.5 | 15   | 15   |
| values below are ng lipid/mg tissue | top1                 | top2 | topM | bot1 | bot2 | BotM |
| GPA(32:1)                           | 0.9                  | 0.7  | 0.8  | 0.6  | 0    | 0    |
| GPA(34:1)                           | 4.6                  | 4    | 4    | 3.4  | 3.8  | 2.6  |
| GPCho(30:0)                         | 10.9                 | 10.7 | 10.2 | 8.9  | 6.9  | 7.3  |
| GPCho(32:1)                         | 30.8                 | 29.7 | 29.5 | 23.7 | 20.4 | 20.3 |
| GPCho(34:0)                         | 19.4                 | 17   | 19.5 | 14.4 | 12.5 | 14.4 |
| GPCho(34:0e)                        | 2.5                  | 2    | 2.2  | 1.5  | 1.8  | 1.4  |
| GPCho(34:1)*                        | 57                   | 55.7 | 56.5 | 46   | 33.3 | 42.1 |
| GPCho(34:1e)/GPCho(34:0p)           | 11.3                 | 12.1 | 10.2 | 9    | 9.2  | 7.1  |
| GPCho(36:1)                         | 74.1                 | 73.3 | 73.2 | 54.2 | 60.8 | 55.2 |
| GPCho(36:1e)/GPCho(36:0p)           | 1.4                  | 1.2  | 1.1  | 0.7  | 0.8  | 0.7  |
| GPCho(36:3)                         | 49.2                 | 48.7 | 49   | 40.9 | 39   | 41.6 |
| GPCho(38:2)                         | 8                    | 8.3  | 7.5  | 3.3  | 4.4  | 3.4  |
| GPCho(38:5)                         | 48.7                 | 45.8 | 45.3 | 39.9 | 33.8 | 38.8 |
| GPCho(40:1)                         | 29.8                 | 24.3 | 29.1 | 25.8 | 22.9 | 22.5 |
| GPCho(40:7)                         | 20.5                 | 15.6 | 17.4 | 12   | 10.4 | 12.6 |
| GPEtn(32:0)                         | 1.2                  | 1.1  | 0.8  | 0.6  | 0    | 0.5  |
| GPEtn(32:1)                         | 0.8                  | 0.7  | 0.9  | 0.4  | 0.3  | 0.5  |
| GPEtn(34:0)                         | 2.6                  | 2.1  | 2.5  | 1.8  | 1.3  | 1.5  |
| GPEtn(34:1)*                        | 13.3                 | 13.5 | 13.1 | 10.4 | 8.1  | 10.5 |
| GPEtn(38:3e)/GPEtn(38:2p)           | 6.4                  | 9.5  | 4.1  | 5.2  | 3.5  | 4    |
| GPEtn(40:4e)/GPEtn(40:3p)           | 12.3                 | 15.1 | 9.2  | 9.5  | 0    | 8.3  |
| GPEtn(40:7)                         | 19.5                 | 18.3 | 18.4 | 18   | 16.3 | 16.4 |
| GPEtn(42:10)                        | 2.9                  | 4    | 1.7  | 1.4  | 1.2  | 1.2  |
| GPEtn(42:5)                         | 1.8                  | 1.9  | 1.6  | 1.4  | 1    | 1.3  |
| GPGro(38:2)                         | 0.9                  | 0.8  | 0.7  | 0.5  | 0.6  | 0.5  |
| GPIIns(38:5)*                       | 8.7                  | 9.7  | 8.5  | 8.2  | 6.1  | 7.2  |
| GPSer(34:1)                         | 19.5                 | 21.3 | 17.5 | 13.4 | 14.1 | 11.1 |
| GPSer(38:1)                         | 3.6                  | 2.9  | 2.4  | 2.3  | 1.9  | 1.9  |
| GPSer(40:2)                         | 3                    | 2.9  | 2.3  | 1.4  | 0.9  | 1.2  |
| GPSer(40:3)                         | 3.1                  | 3.2  | 2.1  | 2.3  | 2.1  | 1.5  |
| GPSer(42:3)                         | 2.2                  | 2.2  | 1.9  | 2    | 1.4  | 1.4  |

\*LC-MS/MS data correlates with MALDI images

GPCho (PC) = phosphatidylcholine, GPEtn (PE) = phosphatidylethanolamine, GPGro (PG) = phosphatidylglycerol, GPIIns (PI) = phosphatidylinositol, GPSer (PS) = phosphatidylserine
